# Supplementary material for: Characteristics of Mesoscale Eddies in the Vicinity of the Kuroshio: Statistics from Satellite Altimeter Observations and OFES Model Data
Source: MDPI journal article supplement (doi:10.3390/jmse10121975), 2022-12-12
Supplement: s1 [file s1]

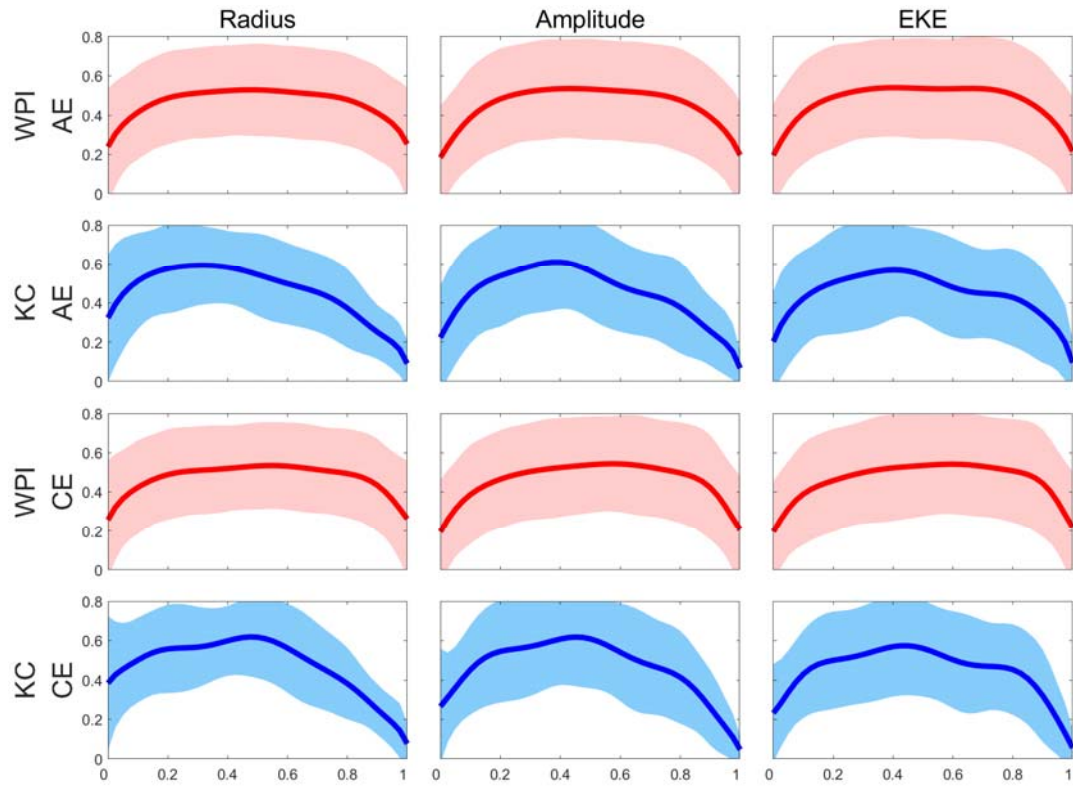

**Figure S1.** Time evolution of mean eddy characteristic parameters (left: eddy radius; middle: eddy amplitude; right: EKE). The bold red curves represent the normalized characteristics of the eddies those in the western Pacific interior (WPI); while the blue ones represent those reach the Kuroshio region (KC). The shadows are their respective standard deviations.
